# Supplementary material for: Factors affecting outcome of acquired comitant esotropia with restricted use of digital devices: ACEDD Study 3
Source: PubMed Central journal article supplement — BMJ Open Ophthalmol. 2024 Oct 31;9(1):e001713. doi: 10.1136/bmjophth-2024-001713 (PMC11529450; doi:10.1136/bmjophth-2024-001713), 2024-10-31
Supplement: bmjophth-9-1-s001.pdf [file bmjophth-9-1-s001.pdf]

## **List of participating institutions of 221 cases (number of patients)**

Hamamatsu University School of Medicine (19), Kanagawa Dental University  
Yokohama Clinic (18), Kyoto Prefectural University of Medicine (15), Kagoshima  
Miyata Eye Clinic (9), National Center for Child Health and Development (9), Kozaki  
Eye Clinic (8), Kyorin University School of Medicine (8), Asahikawa Medical  
University (7), Hyogo medical university (7), Japan Community Healthcare  
Organization Chukyo Hospital (7), Nagoya University Graduate School of Medicine  
(7), Juntendo University Nerima Hospital (6), Kagawa Saiseikai Hospital (6), Tokai  
University School of Medicine (6), Fukushima Medical University (5), Okada Eye  
Clinic (5), University of Toyama (5), Hidaka Hospital and Heisei Hidaka Clinic (4),  
Kawasaki Medical School (4), CS eye clinic (3), International University of Health and  
Welfare Hospital (3), Machida Hospital (3), Nagata Eye Clinic (3), Ochanomizu-Inoue  
Eye Clinic and Nishikasai-Inouye Eye Hospital (3), Saneikai Tsukazaki Hospital (3),  
Sugita Eye Hospital (3), Saitama Prefectural Children's Medical Center (3), Tohoku  
University Hospital (3), Tottori University (3), Ueoka Eye Clinic (3), University of  
Tsukuba (3), Ehime University Hospital (2), Fukuoka Children's Hospital (2),  
Hinokuma Eye Clinic (2), Kobe University Graduate School of Medicine (2), Osaka  
Women's and Children's Hospital (2), Tokushima University Hospital (2), Chiba  
Children's Hospital (1), Heiwa Eye Clinic (1), Ibara City Hospital (1), Iwate medical  
university (1), Kagoshima University Graduate School of Medical and Dental Sciences  
(1), Kaiya Eye Clinic (1), Kanazawa University Hospital (1), Kitasato University  
Hospital (1), Kono Eye Clinic (1), Miki Eye Clinic (1), Nara Medical University (1),  
Suzuki Eye Clinic Kichikoji (1), Teikyo University School of Medicine (1), Tokyo

Metropolitan Hospital Organization Tokyo Metropolitan Tama Medical Center (1),

Tokyo Metropolitan Ohtsuka Hospital (1), Totsuka eye clinic (1),

Ueno eye clinic (1), Yamagata University Faculty of Medicine (1)
