# Supplementary material for: Factors affecting outcome of acquired comitant esotropia with restricted use of digital devices: ACEDD Study 3
Source: PubMed Central journal article supplement — BMJ Open Ophthalmol. 2024 Oct 31;9(1):e001713. doi: 10.1136/bmjophth-2024-001713 (PMC11529450; doi:10.1136/bmjophth-2024-001713), 2024-10-31
Supplement: bmjophth-9-1-s002.pdf [file bmjophth-9-1-s002.pdf]

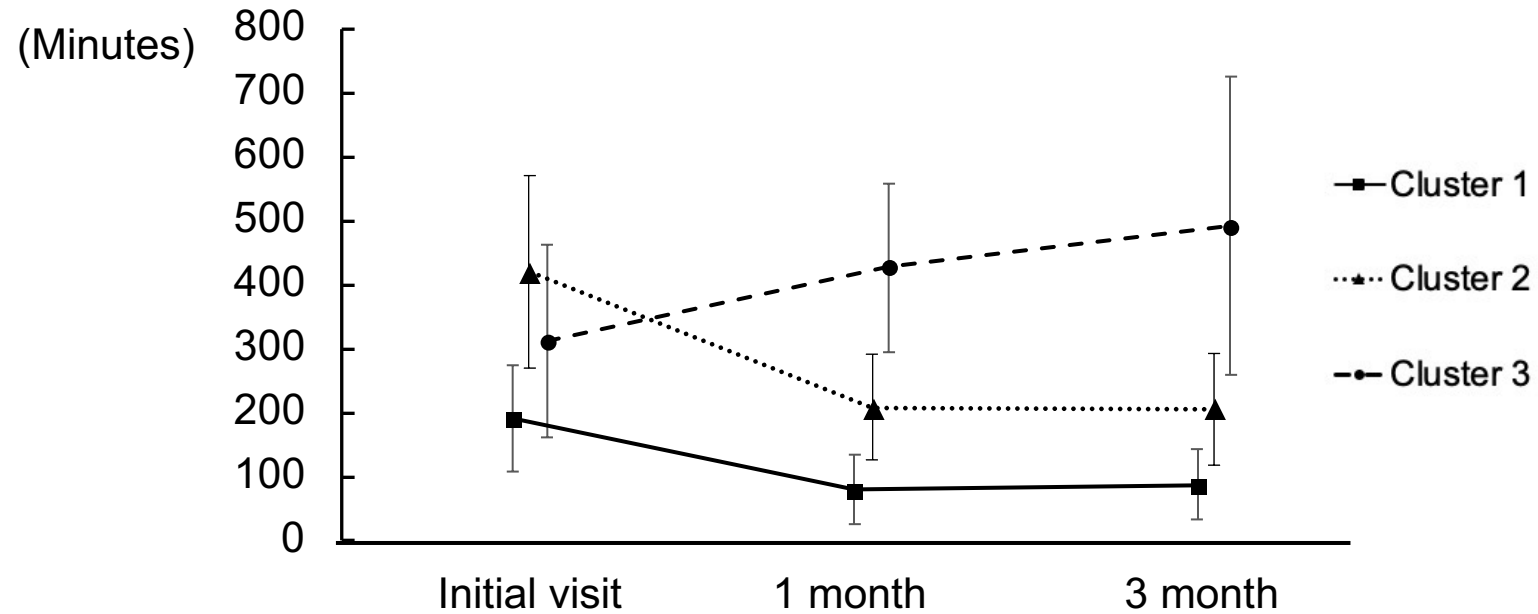

| Factor / Cluster               | 1<br>n=82    | 2<br>n=35     | 3<br>n=20     | P value |
|--------------------------------|--------------|---------------|---------------|---------|
| Age (years)                    | 14.9 (7.9)   | 18.2 (5.6)    | 21.9 (5.9)    | <0.001  |
| DD time at initial visit (min) | 190.8 (83.2) | 420.2 (150.6) | 311.9 (150.8) | <0.001  |
| DD time at 1 month (min)       | 79.7 (54.4)  | 208.6 (82.7)  | 426.3 (131.9) | <0.001  |
| DD time at 3 month (min)       | 87.7 (55.0)  | 205.1 (87.4)  | 492.4 (233.4) | <0.001  |

**FigureS1. Clustering the cases by DD time change**

It was divided into three groups: Cluster1 and 2 that were able to reduce DD time and Cluster3 that was not able to reduce DD time. The table below provides a summary showing the number of cases and age (mean(SD)) for each cluster group.
