# Supplementary material for: Factors affecting outcome of acquired comitant esotropia with restricted use of digital devices: ACEDD Study 3
Source: PubMed Central journal article supplement — BMJ Open Ophthalmol. 2024 Oct 31;9(1):e001713. doi: 10.1136/bmjophth-2024-001713 (PMC11529450; doi:10.1136/bmjophth-2024-001713), 2024-10-31
Supplement: bmjophth-9-1-s003.pdf [file bmjophth-9-1-s003.pdf]

### Supplementary Table S1

#### Factors associated with the outcome analysed by ordinal logistic regression analysis using original data

| Factors                                      | Model 1 |           |              | Model 2 |           |              | Model 3 |           |              |
|----------------------------------------------|---------|-----------|--------------|---------|-----------|--------------|---------|-----------|--------------|
|                                              | OR      | 95% CI    | P value      | OR      | 95% CI    | P value      | OR      | 95% CI    | P value      |
| Sex (male)                                   | 1.00    | 0.70-1.42 | 0.99         | 1.06    | 0.75-1.50 | 0.75         | 1.02    | 0.72-1.47 | 0.90         |
| Stereoacuity (log)                           |         |           |              | 1.22    | 0.99-1.51 | 0.063        | 1.31    | 1.10-1.56 | <b>0.003</b> |
| Adhering to the recommended time             | 0.79    | 0.54-1.14 | 0.20         | 0.78    | 0.54-1.13 | 0.19         | 0.93    | 0.62-1.40 | 0.74         |
| Successful DD time halving                   | 0.63    | 0.43-0.92 | <b>0.016</b> | 0.63    | 0.43-0.92 | <b>0.016</b> |         |           |              |
| Strabismus angle at distance (PD)            | 1.01    | 0.99-1.02 | 0.51         |         |           |              | 1.02    | 1.00-1.03 | <b>0.023</b> |
| Strabismus angle at near (PD)                | 1.00    | 0.99-1.02 | 0.93         | 0.99    | 0.97-1.02 | 0.54         | 1.01    | 1.00-1.02 | 0.10         |
| Duration from onset to visit within 3 months | 0.93    | 0.62-1.38 | 0.70         | 0.94    | 0.63-1.41 | 0.76         | 0.86    | 0.57-1.28 | 0.46         |
| Refractive error (D)                         | 1.00    | 0.94-1.06 | 0.87         | 1.00    | 0.94-1.06 | 0.89         | 0.99    | 0.93-1.05 | 0.65         |
| Anisometropia 1.5 D or greater               | 1.16    | 0.53-2.52 | 0.71         | 1.19    | 0.55-2.57 | 0.66         | 0.90    | 0.39-2.04 | 0.80         |
| Using prism                                  | 0.97    | 0.63-1.50 | 0.89         | 0.93    | 0.61-1.44 | 0.75         | 0.84    | 0.55-1.30 | 0.44         |
| History of strabismus or amblyopia           | 0.81    | 0.45-1.46 | 0.49         | 0.90    | 0.51-1.61 | 0.72         | 1.03    | 0.57-1.83 | 0.93         |

Model 1: Adjusted for Age and Stereoacuity. Model 2: Adjusted for Age and Strabismus angle at distance. Model 3: Adjusted for Age and Successful DD time halving.

D: diopters, PD: prism diopters, DD time: the amount of time spent using handheld digital devices per day, OR: odds ratio, 95% CI: 95% confidence interval
