# Supplementary material for: Factors affecting outcome of acquired comitant esotropia with restricted use of digital devices: ACEDD Study 3
Source: PubMed Central journal article supplement — BMJ Open Ophthalmol. 2024 Oct 31;9(1):e001713. doi: 10.1136/bmjophth-2024-001713 (PMC11529450; doi:10.1136/bmjophth-2024-001713), 2024-10-31
Supplement: bmjophth-9-1-s004.pdf [file bmjophth-9-1-s004.pdf]

## Supplementary Table S2

Factors associated with the outcome analysed by ordinal logistic regression analysis using data after missing data imputed (n=177)

| Factors                                      | Model 1 |           |             | Model 2 |           |             | Model 3 |           |              |
|----------------------------------------------|---------|-----------|-------------|---------|-----------|-------------|---------|-----------|--------------|
|                                              | OR      | 95% CI    | P value     | OR      | 95% CI    | P value     | OR      | 95% CI    | P value      |
| Sex (male)                                   | 1.02    | 0.71-1.46 | 0.92        | 1.02    | 0.71-1.46 | 0.90        | 1.06    | 0.74-1.52 | 0.75         |
| Stereoacuity (log)                           |         |           |             | 1.19    | 0.97-1.45 | 0.10        | 1.26    | 1.07-1.50 | <b>0.006</b> |
| Adhering to the recommended time             | 0.82    | 0.57-1.16 | 0.25        | 0.82    | 0.58-1.16 | 0.26        | 0.96    | 0.65-1.41 | 0.82         |
| Successful DD time halving                   | 0.65    | 0.46-0.93 | <b>0.02</b> | 0.66    | 0.46-0.94 | <b>0.02</b> |         |           |              |
| Strabismus angle at distance (PD)            | 1.00    | 0.99-1.02 | 0.55        |         |           |             | 1.01    | 1.00-1.03 | <b>0.03</b>  |
| Strabismus angle at near (PD)                | 1.00    | 0.98-1.01 | 0.97        | 0.99    | 0.97-1.02 | 0.63        | 1.01    | 1.00-1.02 | 0.10         |
| Duration from onset to visit within 3 months | 0.92    | 0.63-1.33 | 0.65        | 0.93    | 0.64-1.36 | 0.79        | 0.91    | 0.62-1.32 | 0.61         |
| Refractive error (D)                         | 1.00    | 0.95-1.06 | 0.94        | 1.00    | 0.95-1.06 | 0.98        | 1.00    | 0.94-1.06 | 0.97         |
| Anisometropia 1.5 D or greater               | 1.13    | 0.55-2.33 | 0.74        | 1.23    | 0.60-2.53 | 0.58        | 1.10    | 0.53-2.29 | 0.80         |
| Using prism                                  | 0.96    | 0.63-1.46 | 0.85        | 0.95    | 0.62-1.44 | 0.79        | 0.85    | 0.56-1.29 | 0.45         |
| History of strabismus or amblyopia           | 0.86    | 0.48-1.55 | 0.62        | 0.95    | 0.54-1.69 | 0.86        | 1.01    | 0.57-1.79 | 0.97         |

Model 1: Adjusted for Age and Stereoacuity. Model 2: Adjusted for Age and Strabismus angle at distance. Model 3: Adjusted for Age and Successful DD time halving.

D: diopters, PD: prism diopters, DD time: the amount of time spent using handheld digital devices per day, OR: odds ratio, 95% CI: 95% confidence interval
